1 **Differentiation of a CD4<sup>+</sup>/CD8αβ<sup>+</sup> Double Positive T Cell Population From The CD8 Pool Is**  
2 **Sufficient To Mediate Graft-vs-Host Disease but not Graft-vs-Leukemia Effects**

3  
4 Nicholas J. Hess<sup>1</sup>, David P. Turicek<sup>1</sup>, Kalyan Nadiminti<sup>3,5</sup>, Amy Hudson<sup>2</sup>, Peiman Hematti<sup>3,5</sup>,  
5 Jenny E. Gumperz<sup>4,5</sup>, \*Christian M. Capitini<sup>1,5</sup>

6  
7 <sup>1</sup>Department of Pediatrics, University of Wisconsin-Madison School of Medicine and Public  
8 Health, Madison, WI

9 <sup>2</sup>Department of Microbiology and Immunology, Medical College of Wisconsin, Milwaukee, WI

10 <sup>3</sup>Division of Hematology/Oncology, Department of Medicine, University of Wisconsin-Madison  
11 School of Medicine and Public Health, Madison, WI

12 <sup>4</sup>Department of Medical Microbiology and Immunology, University of Wisconsin-Madison School  
13 of Medicine and Public Health, Madison, WI

14 <sup>5</sup>University of Wisconsin-Madison Carbone Cancer Center, Madison, WI

15

16 **\*Corresponding Author:**

17 Christian M. Capitini

18 University of Wisconsin

19 1111 Highland Ave

20 WIMR 4137

21 Madison, WI 53705

22 Office: (608) 262-2415

23 Fax: (608) 265-9721

24 Email: [ccapitini@pediatrics.wisc.edu](mailto:ccapitini@pediatrics.wisc.edu)

25

26 ORCID: 0000-0001-5720-9305 (NJH); 0000-0003-1852-2192 (JEG); 0000-0002-2276-6731  
27 (CMC)

28

29

30 **Abstract Word Count = 271**

31 **Word Count = 4255**

32 **Figure Count = 7**

33 **Reference Count = 25**

34 **Running Title: DPT Are Predictive and Sufficient for GVHD**

35 **Abstract**

36 Acute graft-vs-host disease (aGVHD) and tumor relapse remain the primary complications  
37 following allogeneic hematopoietic stem cell transplantation (allo-HSCT) for malignant blood  
38 disorders. While post-transplant cyclophosphamide has reduced the overall prevalence and  
39 severity of aGVHD, relapse rates remain a concern. Thus, there remains a need to identify the  
40 specific human T cell subsets mediating GVHD pathology versus graft-versus-leukemia (GVL)  
41 effects. In xenogeneic transplantation studies using primary human cells from a variety of donors  
42 and tissue sources, we observed the development of a mature CD4<sup>+</sup>/CD8αβ<sup>+</sup> double positive T  
43 cell (DPT) population in mice succumbing to lethal aGVHD but not in mice that failed to develop  
44 aGVHD. The presence of DPT, irrespective of graft source, was predictive of lethal GVHD as  
45 early as one week after xenogeneic transplantation. DPT co-express the master transcription  
46 factors of the CD8 and CD4 lineages, RUNX3 and THPOK respectively, and produce both  
47 cytotoxic and modulatory cytokines. To identify the origin of DPT, we transplanted isolated human  
48 CD4 or CD8 T cells, which in turn revealed that DPT only arise from the CD8 pool. Interestingly,  
49 re-transplantation of sorted CD8 T cells from GVHD mice did not reveal a second wave of DPT  
50 differentiation. Re-transplantation of flow-sorted DPT, CD8 or CD4 T cells from GVHD mice  
51 revealed that DPT are sufficient to mediate GVHD pathology but not GVL effects versus B-cell  
52 acute lymphoblastic leukemia. Lastly, we confirmed the presence and correlation of DPT with  
53 aGVHD pathology in a small cohort of allo-HSCT patients that developed grade 2-4 aGVHD in  
54 our clinic. Further understanding of DPT differentiation and pathology may lead to targeted  
55 prophylaxis and/or treatment regimens for aGVHD and potentially other human chronic  
56 inflammatory diseases.

57

58

59

60 **Key Points**

- 61 1. Human DPT cell differentiation is a predictive metric of xenogeneic GVHD lethality
- 62 2. The origin of DPT are CD8 T cells that gain THPOK expression and CD4 lineage effector  
63 functions
- 64 3. DPT cells are sufficient to mediate GVHD pathology but not GVL effects

## 65 **Introduction**

66 Acute graft-vs-host disease (aGVHD) and relapse remain the primary complications following  
67 allogeneic hematopoietic stem cell transplantation (allo-HSCT)<sup>1,2</sup>. While the field has made  
68 significant strides in reducing aGVHD, current aGVHD prophylaxis regimens target the entire T  
69 cell population, hindering the efficacy of any graft-vs-leukemia (GVL) effects mediated by donor  
70 T cells<sup>3,4</sup>. Thus, delineating specific cellular mechanism(s) leading to aGVHD pathology versus  
71 GVL effects has remained a top priority for the field.

72  
73 The etiology of aGVHD has been well documented using mouse models. Recipient hematopoietic  
74 and/or non-hematopoietic antigen-presenting-cells activated from the conditioning regimen  
75 present host antigen to donor T cells<sup>5-7</sup>. A subset of these donor T cells will be allo-reactive to the  
76 presented donor antigens and differentiate into TH<sub>1</sub> and TH<sub>17/22</sub> T cells to mediate gastrointestinal,  
77 liver and/or skin pathology<sup>8-11</sup>. While allo-reactive T cells are derived from both CD4 and CD8  
78 lineages, most aGVHD research has focused on the differentiation of CD4 lineage subsets that  
79 promote pathology thought to be mediated by CD8 T cells. Unfortunately, past clinical trials  
80 investigating the inhibition of these CD4 lineages based on cytokine blockade have been met with  
81 limited success<sup>12-14</sup>.

82  
83 Recent studies have highlighted the presence of a unique human T cell population expressing  
84 both CD4 and CD8 T cell lineage markers in a variety of chronic inflammatory diseases<sup>15-18</sup>. These  
85 double positive T cells (DPT) have also been implicated in islet graft rejection in a nonhuman  
86 primate model<sup>19,20</sup>. These studies suggest that DPT may represent a novel human T cell  
87 population with a role in inflammatory diseases like aGVHD.

88  
89 In this study, we identified a significant correlation between the presence of DPT in peripheral  
90 blood (PB) and aGVHD pathology. We observed in a xenogeneic transplant model that DPT were  
91 not present in any starting graft tissue, developed only after transplantation and were significantly  
92 correlated and predictive of lethal aGVHD. DPT differentiated from the CD8 T cell pool and gained  
93 expression of the master CD4 transcription factor, THPOK, along with the capacity to secrete  
94 modulatory cytokines normally associated with the CD4 lineage. Isolated DPT were sufficient to  
95 mediate aGVHD pathology but had no direct GVL activity against two human B-cell acute  
96 lymphoblastic leukemia (B-ALL) cell lines. Lastly, we collected leftover blood samples from non-  
97 GVHD and grade 2-4 aGVHD allo-HSCT patients and confirmed the presence and correlation of  
98 DPT with aGVHD diagnosis.

## 99 **Methods**

100 *Isolation of Primary Human Cells.* Human peripheral blood was collected from healthy consenting  
101 donors according to IRB protocol 2014-0806. Leftover and de-identified remnants of human bone  
102 marrow and G-CSF mobilized peripheral blood grafts used for allo-HSCT procedures were  
103 collected under IRB protocol 2016-0298. De-identified human umbilical cord blood was collected  
104 from the Medical College of Wisconsin's cord blood bank. All human blood samples were diluted  
105 1:1 with leukocyte isolation buffer, composed of phosphate-buffered saline (PBS), 2mM EDTA  
106 and 2% fetal bovine serum (FBS), prior to ficoll density-gradient centrifugation (1100xg for 15 min  
107 with 0 brake). When indicated, RosetteSep T cell, CD4 or CD8 enrichment kits were used  
108 (STEMCELL Technologies, Seattle, WA). For Figure 4F and Figure 7, leftover primary human  
109 blood samples were collected from allo-HSCT patients according to IRB protocol 2020-1490. RBC  
110 were lysed using 1X RBC lysis buffer (BioLegend) and stained for flow cytometry.

111  
112 *Transplantation of human cells into NBSGW Mice.* Equal numbers of male and female  
113 immunodeficient NSG (NOD.Cg-Prkdc<sup>scid</sup> Il2rg<sup>tm1Wjl</sup>/SzJ, Jackson Laboratories, Bar Harbor, ME)  
114 or NBSGW (NOD.Cg-Kit<sup>W41J</sup>Tyr<sup>+</sup>Prkdc<sup>scid</sup>IL2rg<sup>tm1Wjl</sup>/ThomJ) between the ages of 8-16 weeks of  
115 age were used for all experiments. All human cells were washed and resuspended in  
116 150µL/mouse of sterile 1X PBS prior to retro-orbital injection. All mice were weighed and  
117 monitored weekly for visible signs of GVHD with a scoring system carried out as follows: 0 = no  
118 signs of GVHD; 1 = 2-5% weight loss; 2 = 6-9% weight loss; 3 = 10-14% weight loss; 4 = ≥ 15%  
119 weight loss. Blood was regularly drawn at 1, 3, 6, 9- and 12-weeks post-transplant by retro-orbital  
120 bleeding. At time of euthanasia, the spleen, one lobe of the liver, lungs and femur were collected  
121 for further processing. All tissue processing and H&E staining was performed by the Experimental  
122 Animal Pathology Lab at the University of Wisconsin-Madison.

123  
124 *Flow Cytometry and Cell-Sorting.* All cells were stained in flow buffer (PBS, 10% FBS) prior to  
125 quantification on an Attune NxT Flow Cytometer (ThermoFisher, Carlsbad, CA) and analysis on  
126 FlowJo v10 (Ashland, OR). For intracellular cytokine staining, Brefeldin A (BioLegend) was added  
127 ~4hrs prior to staining. Fixation buffer was added to the cells prior to intracellular staining  
128 permeabilization wash buffer (BioLegend) and antibody staining. The antibody clones used  
129 include mCD45 (A20), ICOS (C398.4A), T-bet (4B10), LAG3 (11C3C65), FASL (NOK-1), CD4  
130 (OKT4), CD69 (FN50), OX40 (Ber-ACT35), CD27 (O323), pSTAT4 (p38), RORγt (Q21-559),  
131 CD44 (BJ18), NKG2D (1D11), PD-1 (EH12.2H7), THPOK (ZFP-67), TIGIT (A15153G), CD45RO  
132 (UCHL1), TIM3 (F38-2E2), pSTAT1 (A17012A), pSTAT3 (13A3-1), pSTAT6 (A15137E), IL-22

133 (2G12A41), GATA3 (16E10A23), CD8 $\alpha$  (RPA-T8), CD25 (BC96), BCL2 (100) 4-1BB (4B4-1),  
134 CD28 (CD28.2), CTLA4 (BNI3), PanHLA (w6/32), CD3 (UCHT1), RUNX3 (SD0803 -  
135 ThermoFisher) and CD8 $\beta$  (SIDI8BEE - ThermoFisher). All antibody clones were from BioLegend  
136 unless otherwise stated. Visualization of cells was complete using an ImageStream Mark II (EMD  
137 Millipore, Burlington, MA).

138  
139 For cell sorting, cells were collected from the blood, spleen, liver, and lungs of mice transplanted  
140 with a lethal dose of PB-mononuclear cells (MNC) approximately 4 weeks prior. Processed  
141 tissues were ficolled as described above to obtain PB-MNC. Human cells were isolated from the  
142 combined PB-MNC using an EasySep Mouse/Human Chimera isolation kit (STEMCELL  
143 Technologies). Human cells were then stained in sterile PBS with the human CD4 (OKT4) and  
144 CD8 $\beta$  (SIDI8BEE) antibodies prior to sorting on a FACSAria Cell Sorter (BD Biosciences, San  
145 Jose, CA). Cells were then maintained in cell culture for 2-3 days prior to transplantation and/or  
146 expansion.

147  
148 *Cell Lines and Cell Culture.* The human B-ALL cell lines RS4;11 and NALM-6 were purchased  
149 from ATCC (Manassas, VA) and cultured using standard RPMI-10 media (RPMI base media,  
150 10% FBS, 1X Pen/Strep, 1mM NEAA, 1X GlutaMAX - ThermoFisher). All cell lines were  
151 mycoplasma tested and authenticated prior to use (IDEXX Bioresearch, Westbrook, ME). After  
152 flow sorting, isolated human CD4, CD8 and DPT populations were expanded by co-culturing with  
153 a 10X dose of irradiated (25Gy, XRAD320 x-ray irradiator) human mononuclear cells from a third-  
154 party donor with 5 $\mu$ g/mL PHA (Millipore Sigma) in RPMI-10 media supplemented with 5ng/mL of  
155 recombinant human IL-2 (NCI Biological Resources Branch, Frederick, MD) and IL-7 (Peprotech).  
156 RPMI-10 media supplemented with IL-2 and IL-7 was exchanged approximately every 3-4 days.

157  
158 *ELISAs.* Mouse blood samples were diluted with 50 $\mu$ L of 1X PBS prior to centrifugation with 60 $\mu$ L  
159 of diluted plasma stored at -20 $^{\circ}$ C. Plasma was further diluted 1:5 prior to ELISA with Assay Buffer  
160 (PBS, 1mM Tween-20, 5% FBS). IFN $\gamma$  ELISAs used the MD-1 clone for coating and a biotinylated  
161 4S.B3 clone for detection prior to visualization with a streptavidin-HRP antibody (BioLegend).

162  
163 *Metabolomic Assay.* ATP production rate was calculated from flow sorted CD4, CD8 and DPT  
164 using an Seahorse XF Real-Time ATP Rate Assay Kit (Agilent, Santa Clara, CA) on a Seahorse  
165 XF/XFe96 analyzer (Agilent) following the manufacturer's instructions.

166

167 *Bioluminescent Imaging.* A total of  $1E^6$  luciferase positive NALM-6 cells were injected retro-  
168 orbitally seven days prior to human T cell transplantation as described above. Luminescence  
169 detection was gathered at the indicated times using an IVIS Spectrum In Vivo Imaging System  
170 (PerkinElmer, Waltham, MA). Briefly, mice were anesthetized and intraperitoneally injected with  
171 100 $\mu$ L of D-luciferin at 30mg/mL and measured for bioluminescence approximately 15 minutes  
172 later.

173  
174 *Statistics.* Graphs and statistical tests were completed using Prism v6 (GraphPad Software, San  
175 Diego, CA). Comparison of 2 groups of data were performed using either unpaired parametric (for  
176 linear data) or non-parametric (for logarithmic data) t-tests. A log rank analysis was used for all  
177 survival data. A p value less than 0.05 was considered significant.

178  
179 *Study Approval.* Human cells and tissues were obtained under IRB protocol 2014-0806 (CMC),  
180 2016-0298 (PH), and 2020-1490 (CMC). Mice procurement and experiments were performed at  
181 the University of Wisconsin-Madison under IACUC approved animal protocol M005915-R01  
182 (CMC).

183

184 **Results**

185

186 **DPT development after transplantation is predictive of lethal GVHD in a xenogeneic**  
187 **transplant model.**

188 Despite the intensive research on aGVHD using mouse models, the number of studies directly  
189 investigating capacity of human T cell subsets to mediate pathology remains limited. This study  
190 sought to how human T cell subsets mediated pathology in a non-conditioned xenogeneic  
191 transplant model. We have previously shown that the development of lethal GVHD in this model  
192 system is not inevitable and in fact can be modulated based on a variety of biological variables<sup>21</sup>.  
193 Surprisingly, transplanting either human PB-MNC or isolated human peripheral blood T cells (PB-  
194 Tc) at sub LD<sub>100</sub> doses, revealed the presence of a human T cell population expressing both CD4  
195 and CD8 preferentially in mice developing lethal GVHD (Figure 1A-C). These double positive T  
196 cells (DPT) express both CD8 $\alpha$  and CD8 $\beta$  and develop irrespective of the human graft tissue  
197 used (Figure 1D, Supplemental Figure 1). The presence of DPT was detected as early as 1-week  
198 post-transplant and across multiple xenogeneic GVHD target organs at the time of sacrifice  
199 (Figure 1C-D, Supplemental Figure 2). Interestingly, the percentage of DPT in the blood of mice  
200 at 1-, 3- and 6-weeks post-transplant was highly predictive of lethal GVHD development in this  
201 model system (Figure 1E). Lastly, DPT were confirmed to represent a mature human T cell  
202 population in this model based on singlet flow cytometric gating, Imagestream analysis and the  
203 universal expression of CD45RO, an antigen-experienced marker, on the DPT population (Figure  
204 1F). While this unique T cell population has been identified in other human chronic inflammatory  
205 diseases, a detailed understanding of their origin and function had remained unexplored until  
206 now<sup>15-20</sup>.

207

208 **DPT arise from highly activated CD8 T cell clones**

209 Unsupervised tSNE clustering of eight T cell markers demonstrated that DPT were more closely  
210 related to the CD8 population than CD4 (Figure 2A). To definitively determine the origin of the  
211 DPT population, we transplanted isolated CD4 or CD8 T cells from the peripheral blood of healthy  
212 donors into a xenogeneic transplant model and monitored the mice for the development of DPT.  
213 Interestingly, DPT only developed from CD8 T cells but not CD4 T cells (Figure 2B-C).  
214 Furthermore, re-transplantation of flow-sorted CD8 T cells did not result in a second wave of DPT  
215 differentiation suggesting that DPT differentiate from specific clones within the CD8 population  
216 (Figure 2D-F). Additional analysis of the phospho-STAT repertoire between the CD8 and DPT  
217 populations did not reveal any significant differences, suggesting that cytokines may not drive

218 differentiation of DPT from the CD8 population (Supplemental Figure 3).

219

### 220 **Expression of CD4 on DPT coincides with the master transcription factor THPOK**

221 During T cell development in the thymus, the master transcription factors RUNX3 and THPOK  
222 are co-expressed until lineage identity (marked by TCR reactivity to either MHC class-I or -II) is  
223 determined. Afterwards, the dominant transcription factor, RUNX3 for CD8 T cells and THPOK  
224 for CD4 T cells, conserve lineage identification through the negative regulation of their counterpart  
225 (Figure 3A)<sup>22</sup>. Surprisingly, DPT express both RUNX3 and THPOK concomitantly, though at  
226 intermediate expression levels, compared to single positive CD4 and CD8 T cell controls (Figure  
227 3B-C). Using CD4 expression as a surrogate for THPOK expression, we next determined if the  
228 expression of CD4 is conserved overtime. Flow-sorted DPT were either re-stimulated ex vivo with  
229 irradiated human PB-MNC and PHA or re-transplanted back into naïve NSG mice to determine if  
230 an in vivo immune milieu is required to maintain CD4 expression on DPT. Most of the flow sorted  
231 DPT were able to maintain their expression of CD4 by either stimulation method for up to 21 days  
232 ex vivo or 63 days in vivo (Supplemental Figure 4).

233

### 234 **DPT repertoire of co-stimulatory and inhibitory ligands are expressed at intermediate 235 levels compared to single positive CD8 and CD4 populations**

236 The CD8 and CD4 T cells display lineage specific expression differences in their co-stimulatory  
237 and co-inhibitory receptors. Since DPT expressed both RUNX3 and THPOK, we next determined  
238 if this resulted in functional changes in their co-stimulatory and co-inhibitory expression patterns.  
239 Similar to CD8 T cells, DPT displayed high levels of NKG2D, and all T cell populations exhibited  
240 high levels of CD44 as expected when present in a lymphopenic environment (Figure 3E-F). But  
241 while CD8 T cells have high levels of CD27 and ICOS, DPT has significantly lower levels of these  
242 markers, yet still slightly higher than CD4 T cells (Figure 3F). Conversely, CD4 T cells displayed  
243 high levels of OX40, with DPT having slightly lower levels but still significantly higher than CD8 T  
244 cells (Figure 3F). The same phenomenon was detected with several co-inhibitory receptors such  
245 as LAG3, TIGIT and TIM3, which were all high on CD8 T cells and DPT but not on CD4 T cells.  
246 Meanwhile PD-1 expression was highest on CD4 T cells, intermediate on DPT and lowest on CD8  
247 T cells (Figure 3G). These same expression patterns were detected in the spleen of GVHD mice  
248 and after ex vivo stimulation of flow-sorted T cell populations (Supplemental Figure 5A-B).

249

### 250 **The DPT population is highly activated and secrete both cytotoxic and modulatory 251 cytokines**



252 Due to the co-expression of the CD8 and CD4 lineage-specific transcription factors and co-  
253 stimulatory/inhibitory receptors, we sought to investigate if the DPT population can secrete both  
254 CD8 and CD4 lineage-specific cytokines. T cells taken from the blood of GVHD mice were  
255 cultured overnight with PMA/ionomycin to characterize their secretome. Interestingly, our results  
256 revealed that DPT were able to secrete not only granzyme and perforin, but also IFN $\gamma$ , TNF $\alpha$ ,  
257 IL17A, IL22 and GM-CSF which are normally reserved for the CD4 lineage (Figure 4A).  
258 Surprisingly, this same expression pattern was seen when T cells were cultured overnight without  
259 a stimulator (only brefeldin A), suggesting that DPT can not only secrete a broad repertoire of  
260 cytokines, but are also actively producing these cytokines in vivo (Figure 4B, Supplemental Figure  
261 6). In support of this observation, we have also detected that DPT express the transcription factors  
262 T-bet and ROR $\gamma$ t at intermediate levels compared to single-positive T cell controls (Supplemental  
263 Figure 5C-E).

264  
265 To further demonstrate DPT are a highly activated T cell population, we performed a metabolic  
266 analysis of overall ATP production rate and relevant contribution from the glycolytic and oxidative  
267 pathways. While all T cell populations displayed similar levels of oxidative respiration, the DPT  
268 population had increased ATP production from the glycolytic pathway, which has been shown to  
269 be associated with T cell activation (Figure 4C). T cell blasting is another example of highly  
270 activated and proliferative T cells that is observed through the increase in their overall size as a  
271 precursor for cell division. While all T cell populations exhibited blasting, a significantly higher  
272 proportion of the DPT population was blasting compared to the CD8 population across several  
273 different tissues (Figure 4D-E). Furthermore, we compared the blasting percentages of CD4, CD8  
274 and DPT in five primary aGVHD patient samples, which again revealed that a higher proportion  
275 of DPT are blasting compared to CD4 and CD8 single positive cells (Figure 4F).

276

### 277 **DPT are sufficient for GVHD pathology**

278 Since we have shown that the DPT population represents a highly activated T cell population in  
279 GVHD, we next sought to confirm if DPT are required and sufficient for GVHD pathology. First,  
280 we transplanted isolated CD4 and CD8 T cells from the blood of healthy donors and monitored  
281 the mice for survival. Both the CD4 and CD8 T cell populations were able to mediate GVHD,  
282 though much higher doses were required for this to occur (i.e.,  $1E^7$  CD4/CD8 T cells vs  $2E^6$  CD8  
283 T cells) (Figure 5A-D and Figure 1B). Importantly, since DPT developed when isolated CD8 T  
284 cells were transplanted, we next re-transplanted flow sorted DPT, CD4 and CD8 T cells from  
285 several GVHD mice into naïve mice and monitored for survival. This experiment showed that at

286 the lower cell doses (i.e.,  $3E^6$ ), the DPT population was able to mediate lethal GVHD while the  
287 CD8 population, which did not re-develop a second wave of DPT, was unable to cause GVHD  
288 (Figure 5E-G and Figure 2E-F). The DPT were shown to have increased systemic IFN $\gamma$  levels in  
289 the plasma and increased T cell infiltration in a variety of organs (Figure 5H-K).

290

### 291 **DPT cannot mediate GVL activity against human B-ALL**

292 We have shown that DPT represent highly activated T cell population arising from the CD8 T cell  
293 pool and are sufficient for GVHD pathology, but it is currently unclear if they can mediate a GVL  
294 effect. To test this, we transplanted the human B-ALL cancer line RS4;11 seven days prior to the  
295 transplantation of isolated DPT or human PB-MNC. Mice from all groups died between four and  
296 ten weeks after transplantation, though while the PB-MNC group exhibited classical signs of  
297 GVHD, mice transplanted with DPT showed pathology similar to the no treatment (NT) group  
298 (Figure 6A). Flow cytometric analysis revealed that while the RS4;11 cancer line remained  
299 abundant in the mice given DPT, the B-ALL cells were almost undetectable in mice given PB-  
300 MNC (Figure 6B-C). The striking difference in GVL activity was not due to the lack of T cells, with  
301 both groups exhibiting an expansion of T cells in their blood over time and increasing levels of  
302 IFN $\gamma$  in the serum (Figure 6D-E). PB-MNC mice experienced a more robust expansion of T cells  
303 expansion and IFN $\gamma$  production, which may be the result of having synergy from both CD4 and  
304 CD8 T cells present.

305

306 To control for this, we next transplanted isolated CD4 or CD8 T cells from healthy donors into an  
307 NSG mouse previously transplanted with the more aggressive NALM-6 human B-ALL cancer line  
308 in addition to DPT. All mice succumbed to leukemia although mice transplanted with CD4 or CD8  
309 T cells experienced significantly prolonged survival (Figure 6F). This prolonged survival was most  
310 likely the result of delayed leukemia progression as detected by IVIS and flow cytometry (Figure  
311 6G-I). Importantly though, there was no difference in T cell expansion in vivo suggesting that the  
312 enhanced GVL activity in single-positive CD4 and CD8 T cells was not due to overall higher T cell  
313 numbers (Figure 6J). Furthermore, we did not detect any additional DPT differentiation from the  
314 CD8 pool as a result of GVL activity (data not shown). Lastly, CD4 and CD8 T cells flow sorted  
315 from GVHD mice also had enhanced GVL activity compared to DPT, though their overall GVL  
316 activity was slightly diminished (Supplemental Figure 7). Overall, we have identified a unique  
317 human T cell subset characterized by co-expression of CD4 and CD8 $\alpha\beta$  as well as the  
318 transcription factors RUNX3 and THPOK that is associated with the presence of severe aGVHD.  
319 This DPT population differentiates from the CD8 T cell pool, exhibits a highly inflammatory

320 phenotype and is sufficient to mediate GVHD pathology. Despite their inflammatory profile, DPT  
321 do not mediate a GVL effect against B-ALL and may represent a biomarker that can distinguish  
322 aGVHD from GVL.

323

324 **Clinical aGVHD is correlated with increased DPT frequency.**

325 To confirm the association between DPT and aGVHD we have identified in our xenogeneic  
326 transplant model, we collected leftover blood samples from 27 allo-HSCT patients between 70-  
327 90 post-transplant. Of these 27 patients, 14 had never developed aGVHD pathology while the  
328 other 13 had active aGVHD of grade 2 or greater. Analysis of their blood samples revealed a  
329 higher percentage of DPT in the patients with active grade 2 or higher aGVHD compared to the  
330 non-aGVHD controls (Figure 7).

## 331 **Discussion**

332 In this study, we highlight the GVHD-specific activity of a human DPT population that differentiates  
333 from the CD8 population as a result of antigen-stimulation. DPT have been identified in renal cell  
334 carcinoma,  $\beta$ -thalassemia major, rheumatoid arthritis and even in allo-HSCT patients<sup>15–18</sup>. DPT  
335 have also been implicated in islet graft rejection in a nonhuman primate model, suggesting that  
336 DPT are an important differentiation state of human T cells<sup>19,20</sup>.

337  
338 One unique feature of DPT is their co-expression of the CD8 and CD4 lineage master transcription  
339 factors, RUNX3 and THPOK respectively. While the co-expression of these transcription factors  
340 is normally reserved for T cell development in the thymus, one other study using a xenogeneic  
341 transplant model has shown that mature human T cells can co-express these transcription  
342 factors<sup>18,22</sup>. Naturally, one assumption is that we are observing a variation of de novo T cell  
343 development in our model system. To account for this, we primarily used PB-MNC grafts which  
344 have extremely low levels of hematopoietic stem cells ( $<0.1\%$ )<sup>23,24</sup>. Additionally, we confirmed  
345 that DPT do not express CD31, a marker of recent thymic emigrants and are positive for the  
346 antigen-experienced marker CD45RO<sup>21</sup>. Lastly, NSG mice lack a functional thymus to support de  
347 novo T cell development, which, in addition to our data showing that DPT are single cells, provides  
348 strong evidence that DPT are a fully mature human T cell population.

349  
350 The specific cellular signals on CD8 T cells that initiate DPT differentiation is currently not known,  
351 though our data supports the hypothesis that it is the result of chronic antigen exposure. Since  
352 we did not detect a second wave of DPT differentiation after the re-transplantation of sorted CD8  
353 T cells from GVHD mice, we assume that the remaining CD8 T cell clones are incapable of  
354 responding to murine tissue antigens. While the specific signals for DPT differentiation are  
355 unknown at this time, we can assume that there is little/no involvement of pro-inflammatory  
356 cytokines based on our use of non-conditioned NSG mice and lack of increased phospho-STAT  
357 expression in DPT<sup>21,23</sup>. While not directly investigated, non-conditioned NSG mice do not develop  
358 a “cytokine storm” as a result of  $\gamma$ -irradiation with the levels of pro-inflammatory cytokines in non-  
359 conditioned mice thought to be extremely low. Unfortunately, other than CD28:CD80/CD86 axis  
360 which is known to be cross-reactive between human and mice, there is little information on the  
361 cross-reactivity of the other co-stimulatory proteins<sup>23</sup>.

362  
363 The identification of DPT as a highly reactive T cell subset also provides additional insight into  
364 the mechanism of PTCy mediated GVHD suppression. PTCy is thought to eliminate rapidly

365 dividing T cells (i.e. antigen activated T cells) through the cross-linking of DNA by its metabolite  
366 phosphoramidate that leads to apoptosis<sup>25</sup>. It is thought that slowly dividing T cell clones maintain  
367 high enough concentration of the protein aldehyde dehydrogenase to protect themselves from  
368 PTCy induced apoptosis, thus eliminating the majority of T cell clones capable of causing GVHD<sup>25</sup>.  
369 Since we know that DPT are a highly activated T cell population, one interesting hypothesis is  
370 that PTCy also acts by eliminating DPTs. Unfortunately, while this may be true, PTCy also has  
371 the “side-effect” of removing GVL-specific T cell clones. Thus, if the above hypothesis is proven  
372 true, the targeted elimination of DPT, which we have observed to not have any direct GVL activity  
373 against at least B-ALL (Figure 7), may become a more specific and directed GVHD prophylaxis  
374 regimen in the future. Testing of DPT against other hematologic malignancies in vitro and with in  
375 vivo GVL models will be warranted.

376  
377 In summary, we have identified a unique human CD4<sup>+</sup>/CD8αβ<sup>+</sup> DPT cell population that is not  
378 present in healthy human graft tissues, differentiates from the CD8 T cell population after  
379 xenogeneic and clinical allo-HSCT, and is predictive of GVHD lethality in mice. DPT are highly  
380 reactive CD8 T cell clones that gain expression of THPOK and subsequent CD4 lineage effector  
381 functions. Furthermore, when isolated DPT are transplanted into NSG mice, the DPT population  
382 is sufficient to mediate GVHD pathology but does not mediate GVL activity against human B-ALL  
383 cell lines. Overall, the identification of DPT as a GVHD-specific T cell population in allo-HSCT  
384 recipients serves as validation of the cellular T cell responses observed post-transplant in  
385 xenogeneic transplant models. Future studies will need to determine if measurement of DPT  
386 prospectively may help predict development of aGVHD and if targeting and/or preventing DPT  
387 differentiation may suppress GVHD.

388 **Author Contributions**

389 NJH, JEG and CMC designed the study; NJH and DPT performed experiments; NJH analyzed  
390 the data; AWH and PH provided resources; NJH and CMC wrote and edited the manuscript.

391

392 **Acknowledgements**

393 The authors would like to thank the University of Wisconsin Carbone Cancer Center (UWCCC)  
394 Flow Cytometry Laboratory, UWCCC Small Molecule Screening Facility, UWCCC Small Animal  
395 Imaging and Radiotherapy Facility and UWCCC Experimental Animal Pathology Laboratory, who  
396 are supported in part by NIH/NCI P30 CA014520.

397

398 **Grant Support**

399 This work was supported in part by NIH/NIAID T32 AI125231 (N.J.H), NIH/NHLBI T32 HL07899  
400 (N.J.H.), NIH/NCATS UL1 TR002373 (N.J.H), the Cormac Pediatric Leukemia Fellowship (N.J.H)  
401 and the Stem Cell and Regenerative Medicine Center Fellowship (N.J.H.). Additional funding  
402 includes NIH/NIAID R21 AI105841, NIH/NIAID R21 AI116007 (J.E.G.), NIH/NIAID R01 AI136500  
403 (J.E.G.), NIH/NHLBI R01 HL153721 (P.H. and C.M.C), St. Baldrick's-Stand Up to Cancer  
404 Pediatric Dream Team Translational Research Grant SU2C-AACR-DT-27-17 (C.M.C.), American  
405 Cancer Society Research Scholar grant RSG-18-104-01-LIB (C.M.C.), NIH/NCI R01 CA215461  
406 (C.M.C.), and the Midwest Athletes Against Childhood Cancer (MACC) Fund (C.M.C). The St.  
407 Baldrick's Foundation collaborates with Stand Up To Cancer. Stand Up To Cancer is a division of  
408 the Entertainment Industry Foundation. Research grants are administered by the American  
409 Association for Cancer Research, the scientific partner of SU2C. The contents of this article do  
410 not necessarily reflect the views or policies of the Department of Health and Human Services, nor  
411 does mention of trade names, commercial products, or organizations imply endorsement by the  
412 US Government. None of these funding sources had any input in the study design, analysis,  
413 manuscript preparation or decision to submit for publication.

414

415 **Disclosure of Conflicts of Interest**

416 C.M.C. reports honorarium from Nektar Therapeutics and Novartis, who had no input in the study  
417 design, analysis, manuscript preparation or decision to submit for publication. The authors declare  
418 that no other relevant financial conflicts of interest exist.

419

## 420 References

- 421 1. D'Souza A, Fretham C, Lee SJ, et al. Current Use of and Trends in Hematopoietic Cell  
422 Transplantation in the United States. *Biol Blood Marrow Transplant*. 2020;26(8):e177–e182.
- 423 2. Goptu M, Romee R, St Martin A, et al. HLA-haploidentical vs matched unrelated donor  
424 transplants with posttransplant cyclophosphamide-based prophylaxis. *Blood*.  
425 2021;138(3):273–282.
- 426 3. Martinez-Cibrian N, Zeiser R, Perez-Simon JA. Graft-versus-host disease prophylaxis:  
427 Pathophysiology-based review on current approaches and future directions. *Blood Reviews*.  
428 2020;100792.
- 429 4. Chang Y-J, Zhao X-Y, Huang X-J. Strategies for Enhancing and Preserving Anti-leukemia  
430 Effects Without Aggravating Graft-Versus-Host Disease. *Front Immunol*. 2018;9:3041.
- 431 5. Piper C, Zhou V, Komorowski R, et al. Pathogenic Bhlhe40+ GM-CSF+ CD4+ T Cells Promote  
432 Indirect Alloantigen Presentation in the GI Tract during GVHD. *Blood*. 2019;
- 433 6. Koyama M, Kuns RD, Olver SD, et al. Recipient nonhematopoietic antigen-presenting cells  
434 are sufficient to induce lethal acute graft-versus-host disease. *Nat. Med*. 2011;18(1):135–142.
- 435 7. Koyama M, Mukhopadhyay P, Schuster IS, et al. MHC Class II Antigen Presentation by the  
436 Intestinal Epithelium Initiates Graft-versus-Host Disease and Is Influenced by the Microbiota.  
437 *Immunity*. 2019;
- 438 8. Gartlan KH, Koyama M, Lineburg KE, et al. Donor T-cell-derived GM-CSF drives alloantigen  
439 presentation by dendritic cells in the gastrointestinal tract. *Blood Adv*. 2019;3(19):2859–2865.
- 440 9. Park S, Griesenauer B, Jiang H, et al. Granzyme A-producing T helper cells are critical for  
441 acute graft-versus-host disease. *JCI Insight*. 2020;
- 442 10. Hashimoto K, Kouno T, Ikawa T, et al. Single-cell transcriptomics reveals expansion of  
443 cytotoxic CD4 T cells in supercentenarians. *Proc Natl Acad Sci U S A*. 2019;116(48):24242–  
444 24251.
- 445 11. Kim S, Reddy P. Targeting Signal 3 Extracellularly and Intracellularly in Graft-Versus-Host  
446 Disease. *Front Immunol*. 2020;11:722.
- 447 12. Kennedy G, Tey S-K, Buizen L, et al. A Phase 3 Double-Blind Study of the Addition of  
448 Tocilizumab versus Placebo to Cyclosporin/Methotrexate GvHD Prophylaxis. *Blood*. 2021;
- 449 13. Antin JH, Weisdorf D, Neuberg D, et al. Interleukin-1 blockade does not prevent acute graft-  
450 versus-host disease: results of a randomized, double-blind, placebo-controlled trial of  
451 interleukin-1 receptor antagonist in allogeneic bone marrow transplantation. *Blood*.  
452 2002;100(10):3479–3482.
- 453 14. Locke FL, Pidala J, Storer B, et al. CD25 Blockade Delays Regulatory T Cell Reconstitution  
454 and Does Not Prevent Graft-versus-Host Disease After Allogeneic Hematopoietic Cell  
455 Transplantation. *Biol Blood Marrow Transplant*. 2017;23(3):405–411.
- 456 15. Menard LC, Fischer P, Kakrecha B, et al. Renal Cell Carcinoma (RCC) Tumors Display Large  
457 Expansion of Double Positive (DP) CD4+CD8+ T Cells With Expression of Exhaustion  
458 Markers. *Front Immunol*. 2018;9:2728.
- 459 16. Zahran AM, Saad K, Elsayh KI, Alblihed MA. Characterization of circulating CD4+ CD8+  
460 double positive and CD4- CD8- double negative T-lymphocyte in children with  $\beta$ -thalassemia  
461 major. *Int. J. Hematol*. 2017;105(3):265–271.
- 462 17. Quandt D, Rothe K, Scholz R, Baerwald CW, Wagner U. Peripheral CD4CD8 double positive  
463 T cells with a distinct helper cytokine profile are increased in rheumatoid arthritis. *PLoS ONE*.  
464 2014;9(3):e93293.
- 465 18. Alhaj Hussen K, Michonneau D, Biajoux V, et al. CD4+CD8+ T-Lymphocytes in Xenogeneic  
466 and Human Graft-versus-Host Disease. *Front Immunol*. 2020;11:579776.
- 467 19. Choi YJ, Park H-J, Park HJ, Jung KC, Lee J-I. CD4hiCD8low Double-Positive T Cells Are  
468 Associated with Graft Rejection in a Nonhuman Primate Model of Islet Transplantation. *J*  
469 *Immunol Res*. 2018;2018:3861079.

- 470 20. Overgaard NH, Jung J-W, Steptoe RJ, Wells JW. CD4+/CD8+ double-positive T cells: more  
471 than just a developmental stage? *J. Leukoc. Biol.* 2015;97(1):31–38.
- 472 21. Hess NJ, Hudson AW, Hematti P, Gumperz JE. Early T Cell Activation Metrics Predict Graft-  
473 versus-Host Disease in a Humanized Mouse Model of Hematopoietic Stem Cell  
474 Transplantation. *J. Immunol.* 2020;205(1):272–281.
- 475 22. Egawa T. A Fateful Decision in the Thymus Controlled by the Transcription Factor ThPOK.  
476 *J.I.* 2021;206(9):1981–1982.
- 477 23. Hess NJ, Brown ME, Capitini CM. GVHD Pathogenesis, Prevention and Treatment: Lessons  
478 From Humanized Mouse Transplant Models. *Frontiers in Immunology.* 2021;12:3082.
- 479 24. Hess NJ, Lindner PN, Vazquez J, et al. Different Human Immune Lineage Compositions Are  
480 Generated in Non-Conditioned NBSGW Mice Depending on HSPC Source. *Front Immunol.*  
481 2020;11:573406.
- 482 25. Nunes NS, Kanakry CG. Mechanisms of Graft-versus-Host Disease Prevention by Post-  
483 transplantation Cyclophosphamide: An Evolving Understanding. *Front Immunol.*  
484 2019;10:2668.  
485



486 **Figure Legends**

487

488 **Figure 1. Development of DPT after transplant is predictive of GVHD lethality.**

489 (A-B) Kaplan-Meier survival curve of NSG mice transplanted with  $5E^6$  PB-MNC (A) or  $2E^6$  PB-Tc  
490 (B). Representative dot plots of mouse blood at 3 weeks post-transplant from a mouse that did  
491 not develop GVHD (blue mouse) and a mouse that died of GVHD (red mouse) highlighting the  
492 presence of DP T cells (red box). Dot plots were gated upstream on singlets, human panHLA-I  
493 and CD3. (C-D) Bar graph showing the percentage of DP T cells at 1-, 3- and 6-weeks post-  
494 transplant in mice transplanted with PB-MNC (C) and at 1-week post-transplant in mice  
495 transplanted with the mononuclear fraction of the graft source indicated. Each dot represents an  
496 individual mouse taken from 5 independent experiments. (E) Receiver-operator-characteristic  
497 (ROC) curve showing the predictive value of DP T cells. (F) Representative Imagestream analysis  
498 of human T cell isolated from mouse blood at 3-weeks post-transplant. PB (peripheral blood), MB  
499 (G-CSF mobilized peripheral blood), BM (bone marrow), CB (umbilical cord blood), MNC  
500 (mononuclear cells), allo-HSCT (allogeneic hematopoietic stem cell transplant). \*  $p < 0.05$ , \*\*  
501  $p < .01$ , \*\*\*  $p < 0.001$

502

503 **Figure 2. DPT differentiate from highly reactive CD8 clones.**

504 (A) Unsupervised tSNE clustering of human T cells concatenated from five GVHD mice. (B-C)  
505 Freshly isolated CD3, CD4 and CD8 PB-T cells from a healthy donor were transplanted into non-  
506 irradiated NSG mice. Representative dot plots show the percentage of DP T cells in the mouse  
507 blood at 3-weeks post-transplant (B) with the percentage of DP T cells from isolated CD4 and  
508 CD8 T cells transplantation further quantified (C). (D-F) NSG mice transplanted with PB-MNC for  
509 4 weeks were euthanized and their organs harvested, ficolled, human cell isolated by magnetic  
510 isolation and the CD4 and CD8 T cells flow-sorted (D). (E) Dot plot highlighting the percentage of  
511 DP T cells in the blood of mice transplanted with flow-sorted CD4 and CD8 T cells 3-weeks post-  
512 transplant. (F) Further quantification of (E). \*  $p < 0.05$ , \*\*  $p < .01$ , \*\*\*  $p < 0.001$

513

514 **Figure 3. Co-dominance of RUNX3 and THPOK in DPT allows for the intermediate  
515 expression of CD4 and CD8 co-stimulatory proteins**

516 (A) Schematic showing the relationship of RUNX3 and THPOK in CD8 and CD4 T cells. (B-D)  
517 Histograms of THPOK and RUNX3 (B) expression compared to an isotype that is further  
518 quantified (C-D). (E) Imagestream visualization of NKG2D expression on CD4, DP and CD8 T  
519 cells. (F) Analysis of 8 co-stimulatory markers on CD4, DP and CD8 T cells. Fold MFI represents

520 the median fluorescent intensity of the indicated marker divided by the median fluorescent  
521 intensity of an isotype control. \*  $p < 0.05$

522

523 **Figure 4. DPT are highly active and secrete both CD4 and CD8 lineage cytokines.**

524 (A-B) T cells from the blood of GVHD mice were incubated overnight with PMA/ionomycin (A) or  
525 brefeldin A (B) prior to intracellular cytokine staining. (C) ATP production rate of the indicated  
526 flow-sorted T cell populations. (D) Representative dot plots of the indicated T cell population taken  
527 from a GVHD mouse. Boxes represent blasting T cells, a marker of activated and proliferating T  
528 cells. (E-F) Quantification of the percentage of T cells blasting from GVHD mice (E) and from  
529 thirteen allo-HSCT patients that developed  $\geq$  grade 2 acute GVHD (F).

530

531 **Figure 5. DPT are sufficient to mediate GVHD lethality after xenogeneic transplantation.**

532 (A-D) Isolated CD4 and CD8 T cells from a healthy donor were transplanted into NSG mice and  
533 monitored for survival (B), GVHD score (C) and IFN $\gamma$  concentration (D). (E-K) FACS sorted CD4,  
534 DPT and CD8 T cell populations were transplanted into NSG mice and monitored for survival (F),  
535 GVHD score (G) and IFN $\gamma$  concentration (H). At the time of euthanasia, the number of T cells in  
536 target organs was quantified (I) and H&E histology performed and scored (J-K).

537

538 **Figure 6. DPT do not possess direct GVL activity against human B-ALL.**

539 (A-E) Kaplan-Meier survival curve (A) of NSG mice transplanted with the human B-ALL cancer  
540 line RS4;11 (black line) seven days prior to the transplantation of either DPT (red line) or PB-MNC  
541 (blue line). Mice were monitored for signs of pathology with mice given NT or DPT experiencing  
542 distinct pathology from PB-MNC. (B-D) Flow analysis (B) of mice given DPT and PB-MNC (C-D).  
543 T cell activation as measured by the concentration of IFN $\gamma$  in the serum of mice (E). (F-J)  
544 Experiment was repeated using the luciferase positive human B-ALL cell line NALM-6 and freshly  
545 isolated CD4 and CD8 T cell from healthy donors along with DPTs. Kaplan-Meier survival curve  
546 (F) of the transplanted mice which all exhibited evidence of leukemia. Leukemic growth was  
547 confirmed using IVIS imaging (G-H) with flow cytometry to quantify the number of leukemia and  
548 T cells in the blood of mice across the indicated time points (I-J).

549

550 **Figure 7. Presence of DPT in aGVHD Allo-HSCT Patients**

551 Blood samples were collected from allo-HSCT patients either at the diagnosis of  $\geq$  grade 2 aGVHD  
552 or between 70-90 days post-transplant. (A) Representative dot plots of a healthy human donor,  
553 an allo-HSCT patient with no signs of a GVHD at 82 days post-transplant and an allo-HSCT

554 patient that had active grade IV aGVHD at 84 days post-transplant. Red box indicates The  
555 CD4<sup>+</sup>/CD8<sup>β</sup><sup>+</sup> DPT population. (B) Bar graph shows a total of 14 non-GVHD patients and 13 ≥  
556 grade 2 aGVHD patient samples were collected. Each symbol indicates an individual patient. \*  
557 p<0.05, \*\* p<.01, \*\*\* p<0.001

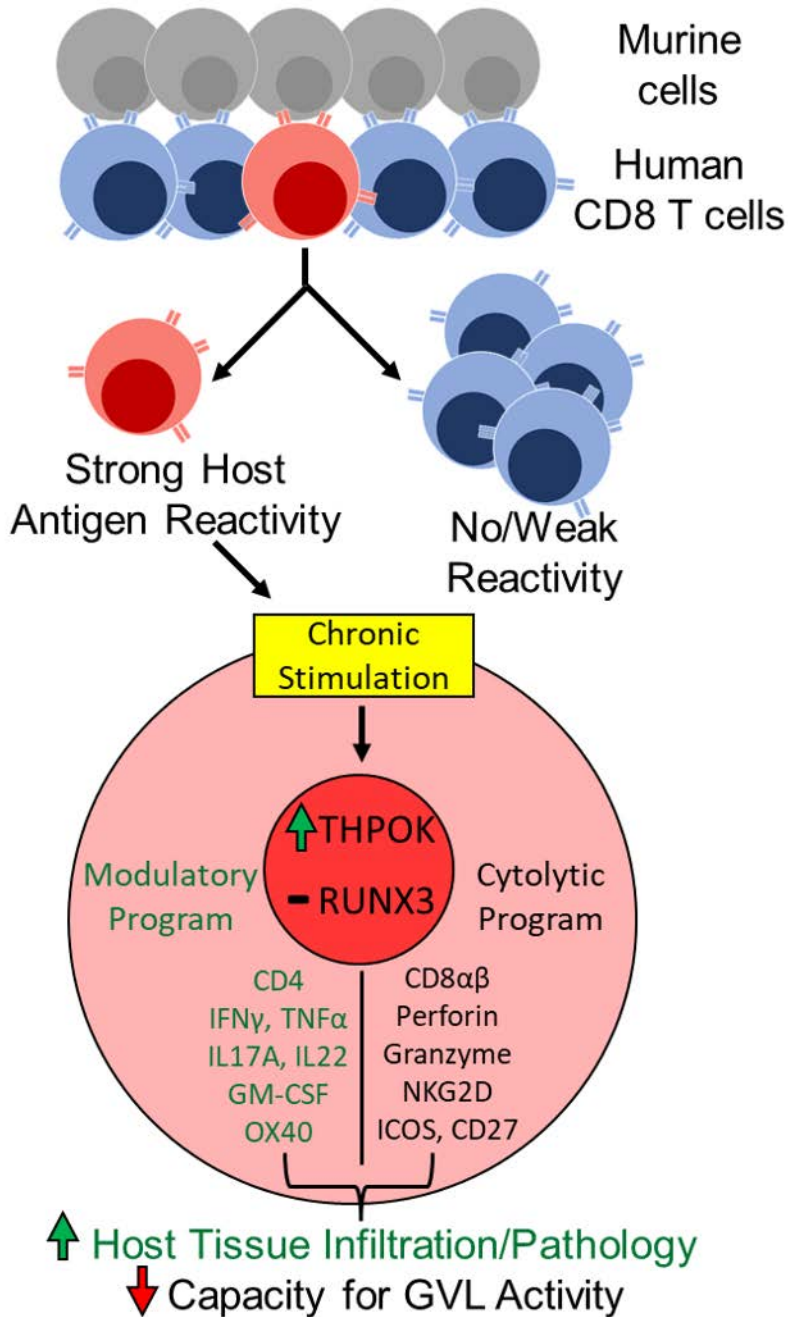

## Visual Abstract

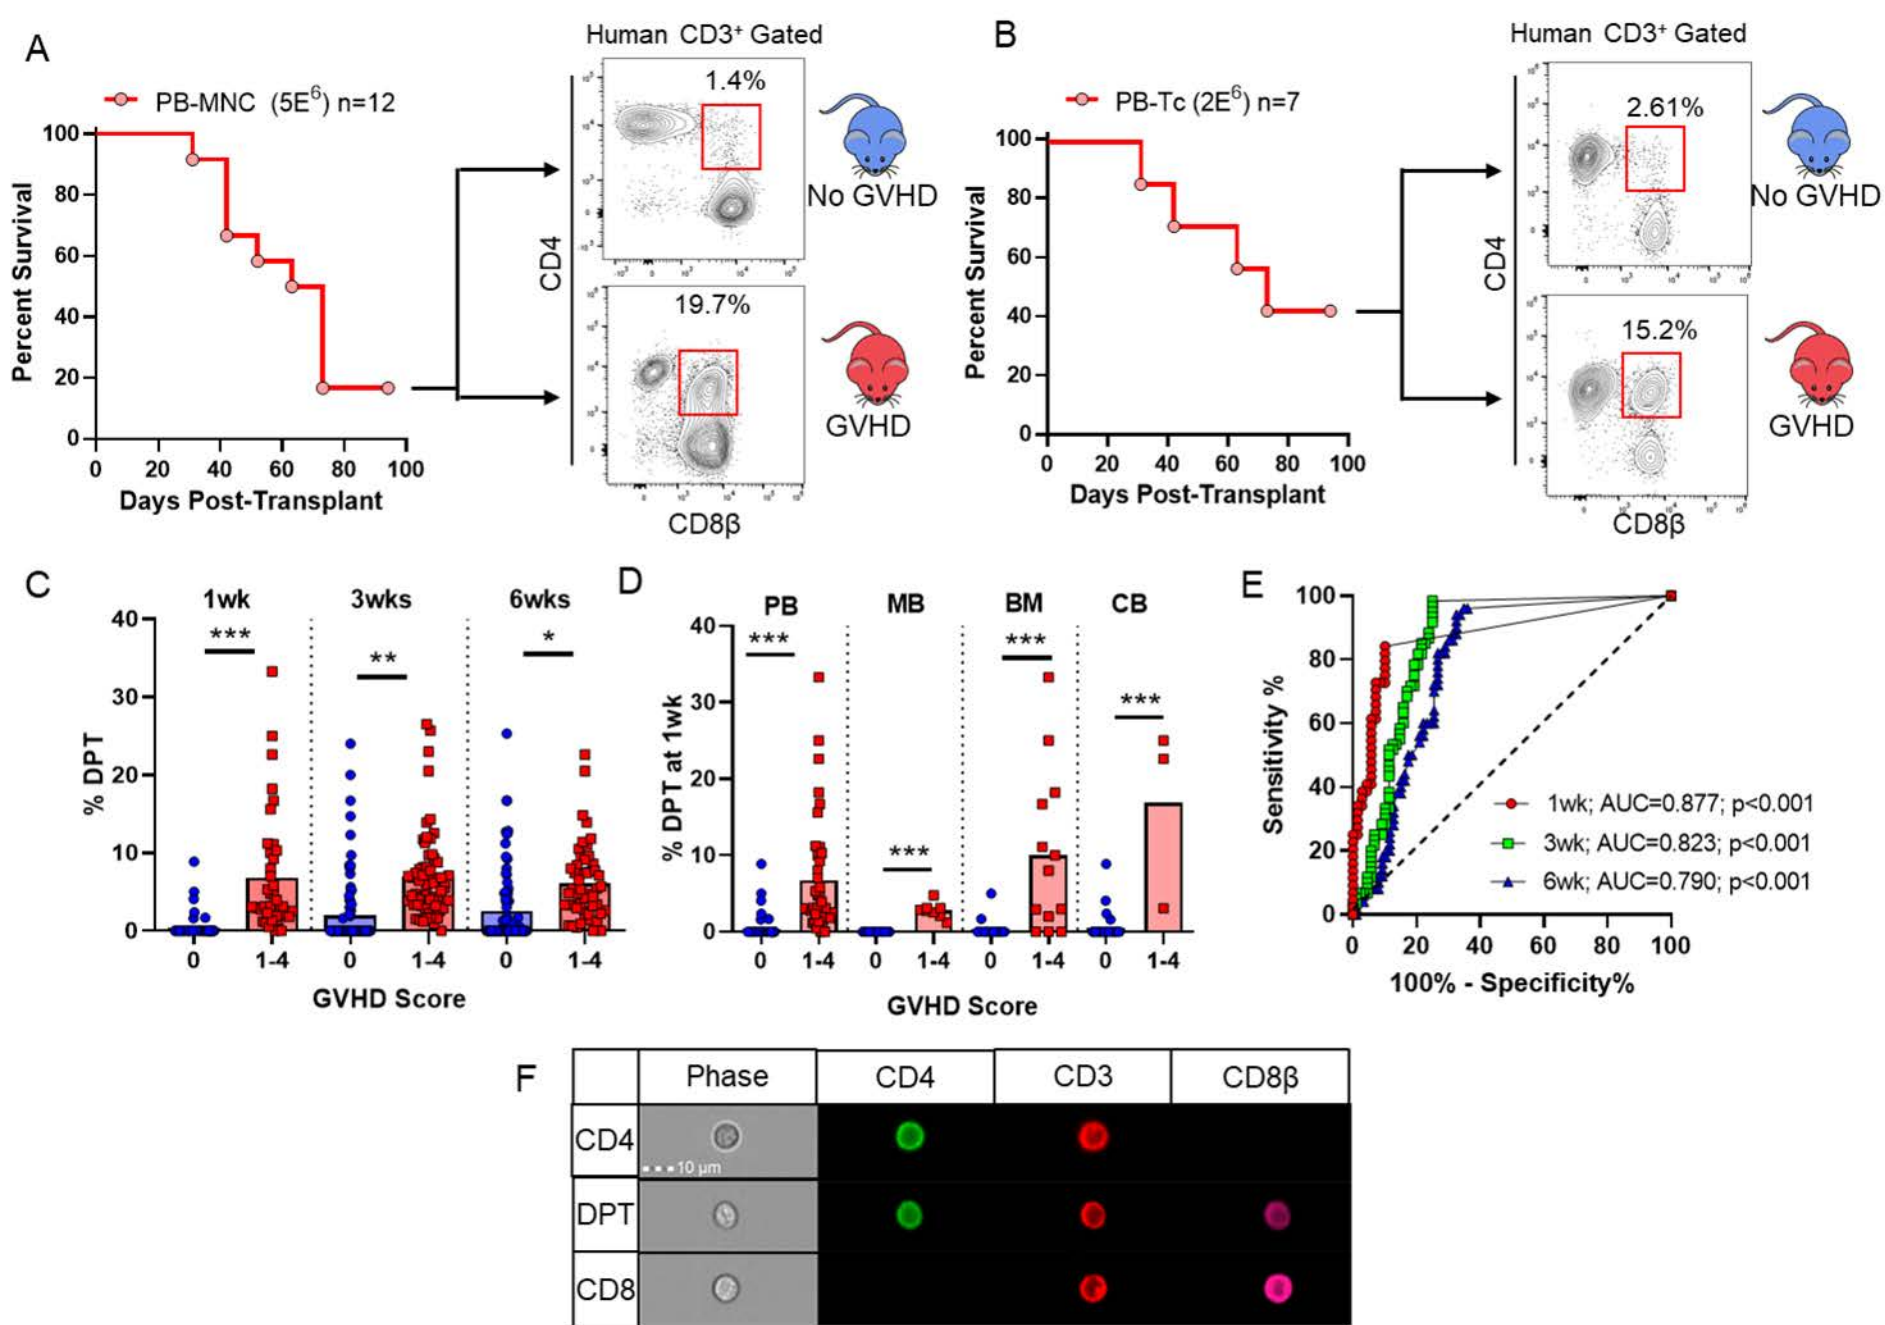

**Figure 1**

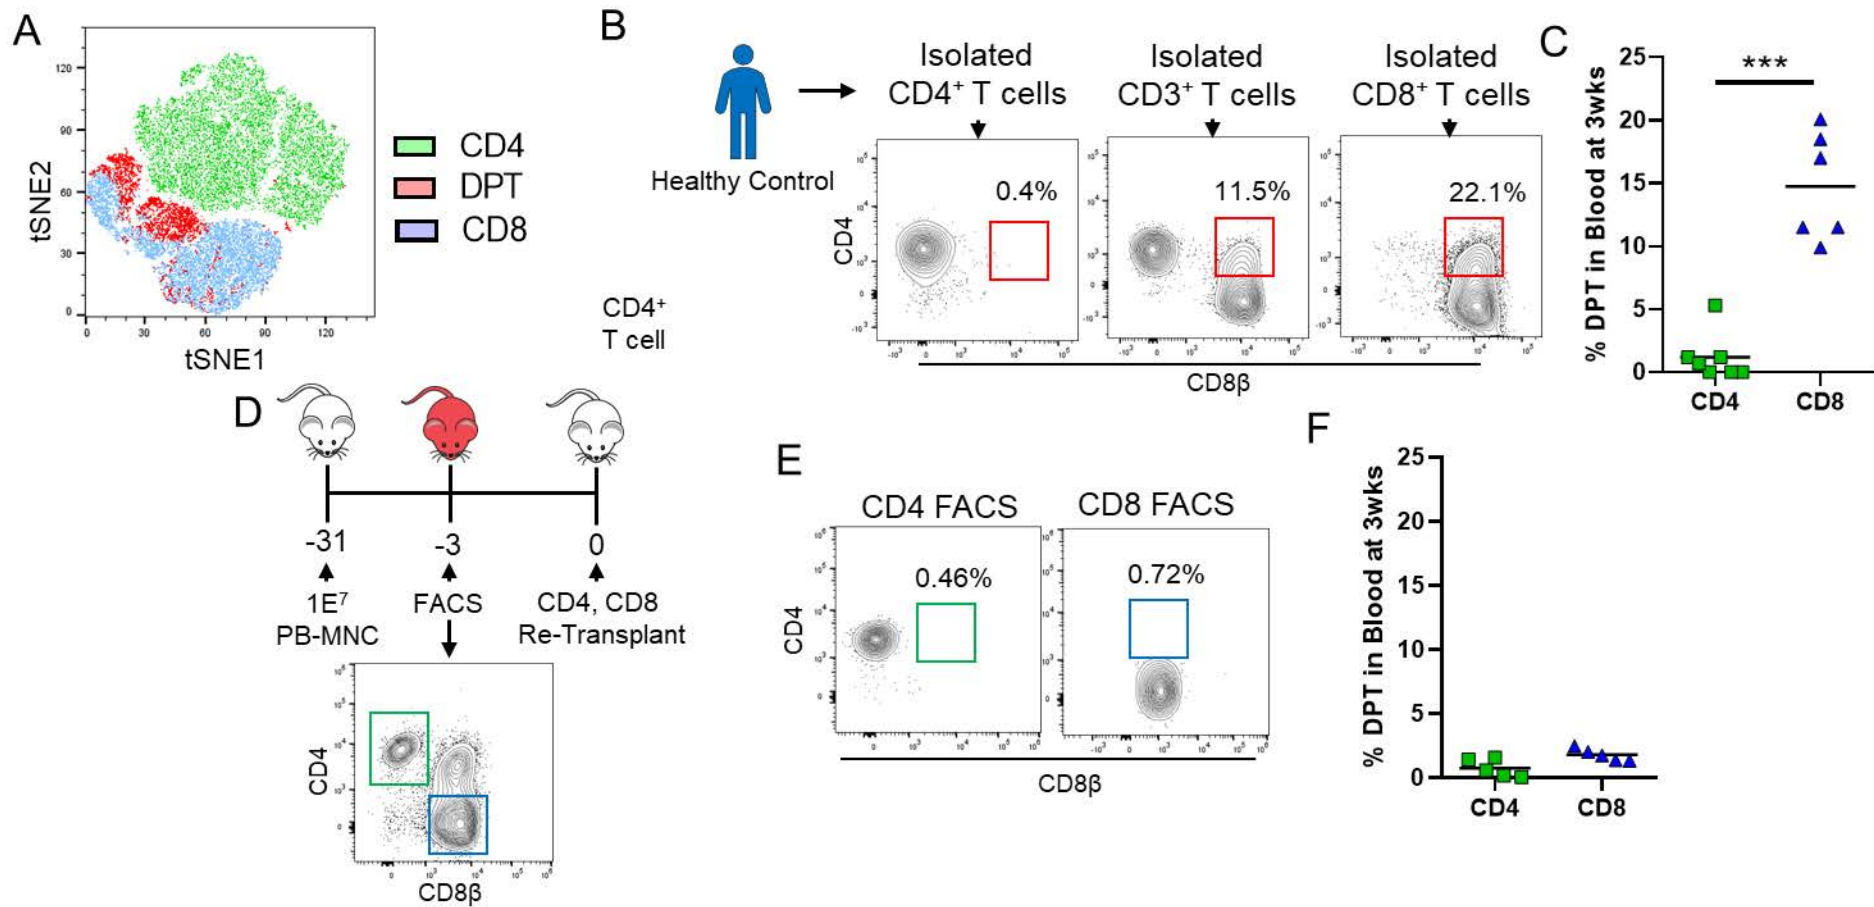

**Figure 2**

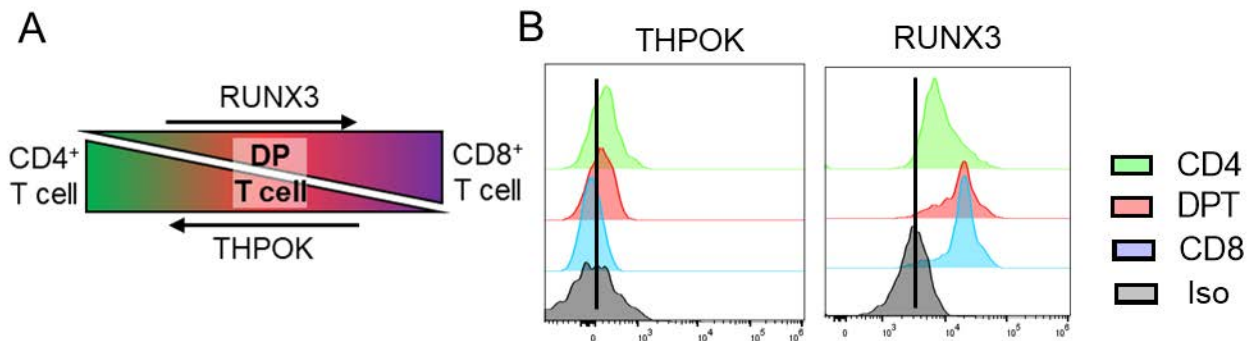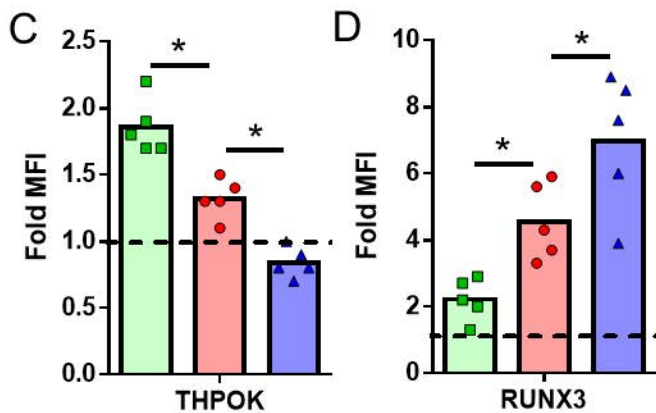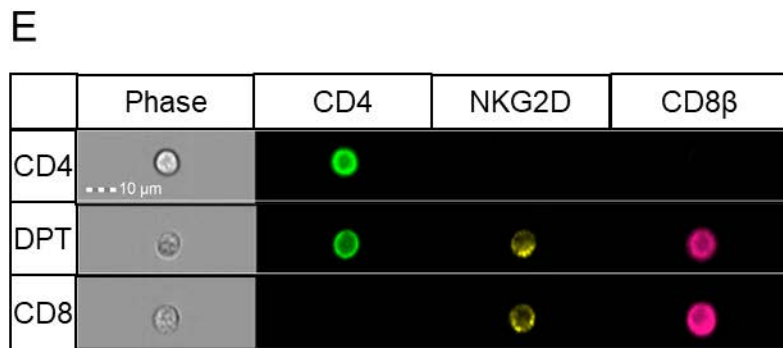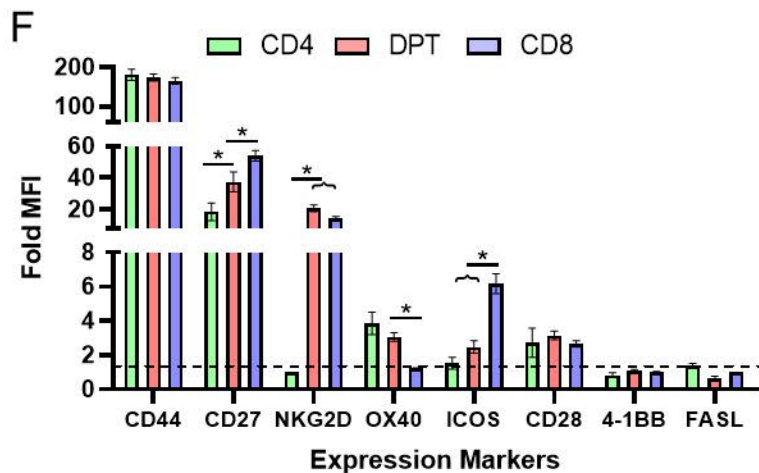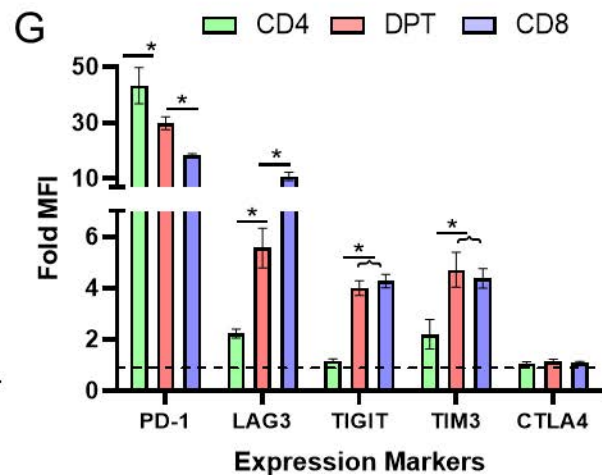

**Figure 3**

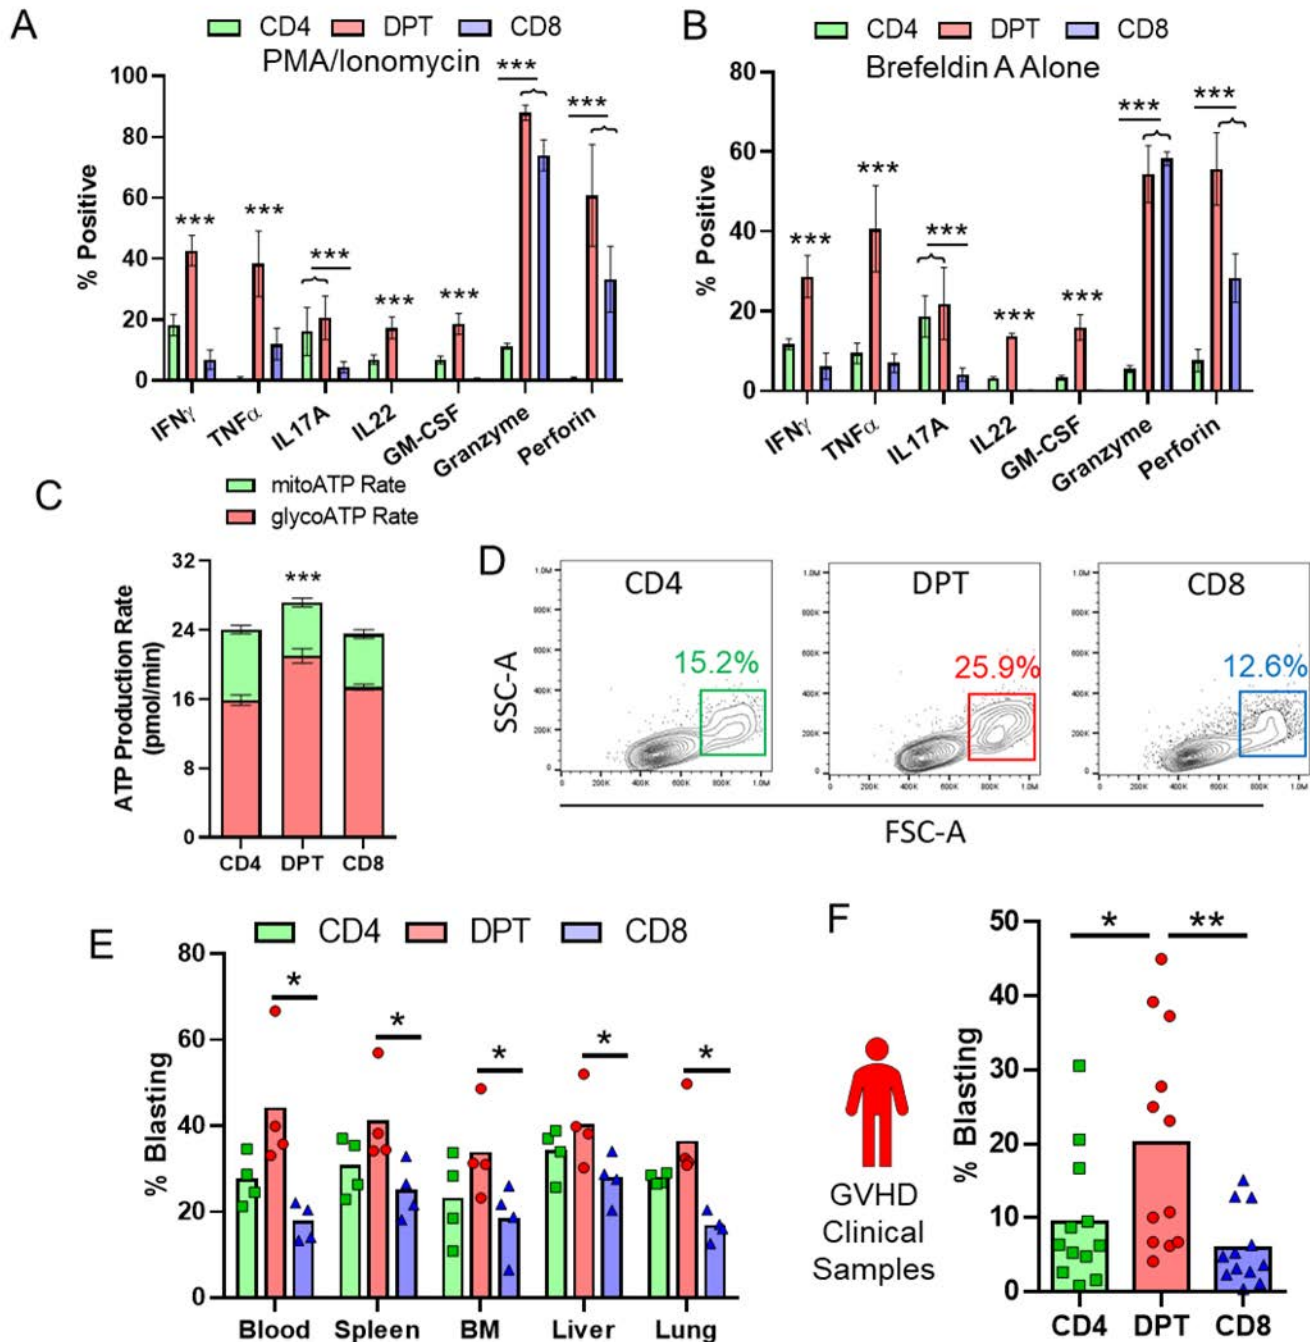

**Figure 4**



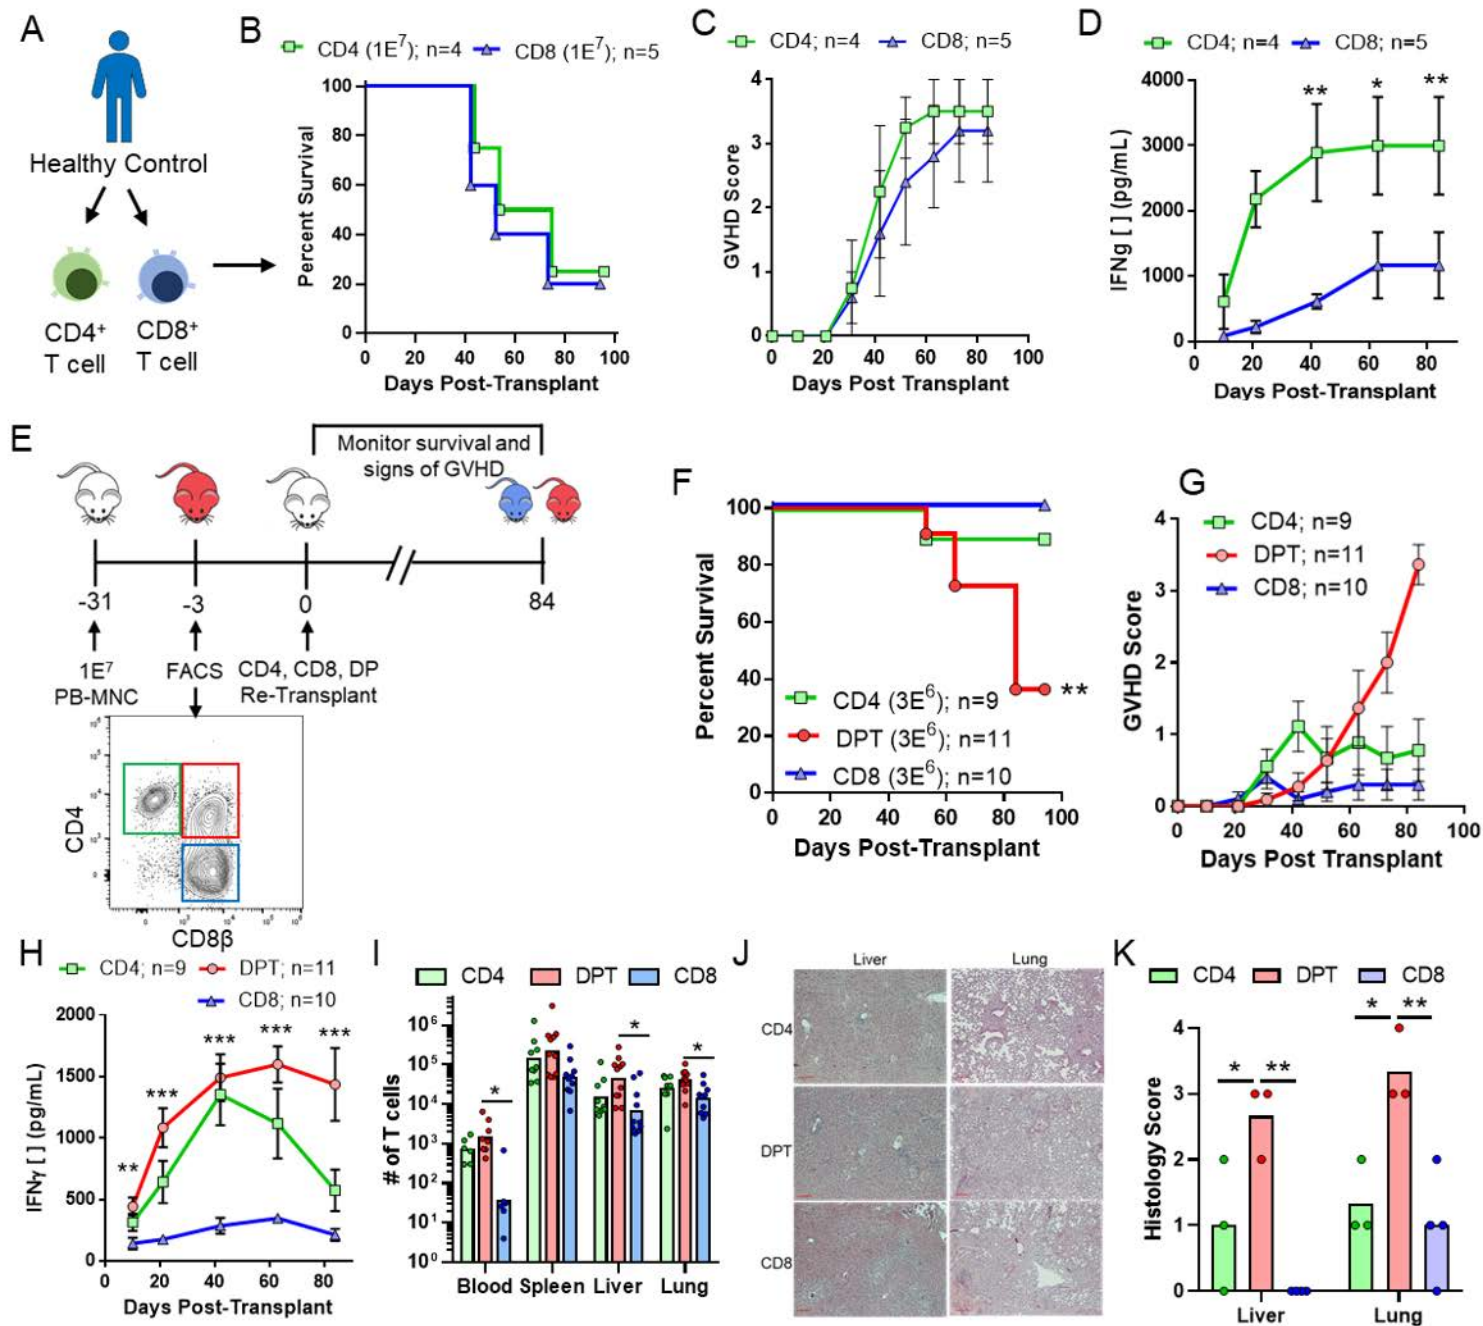

**Figure 5**

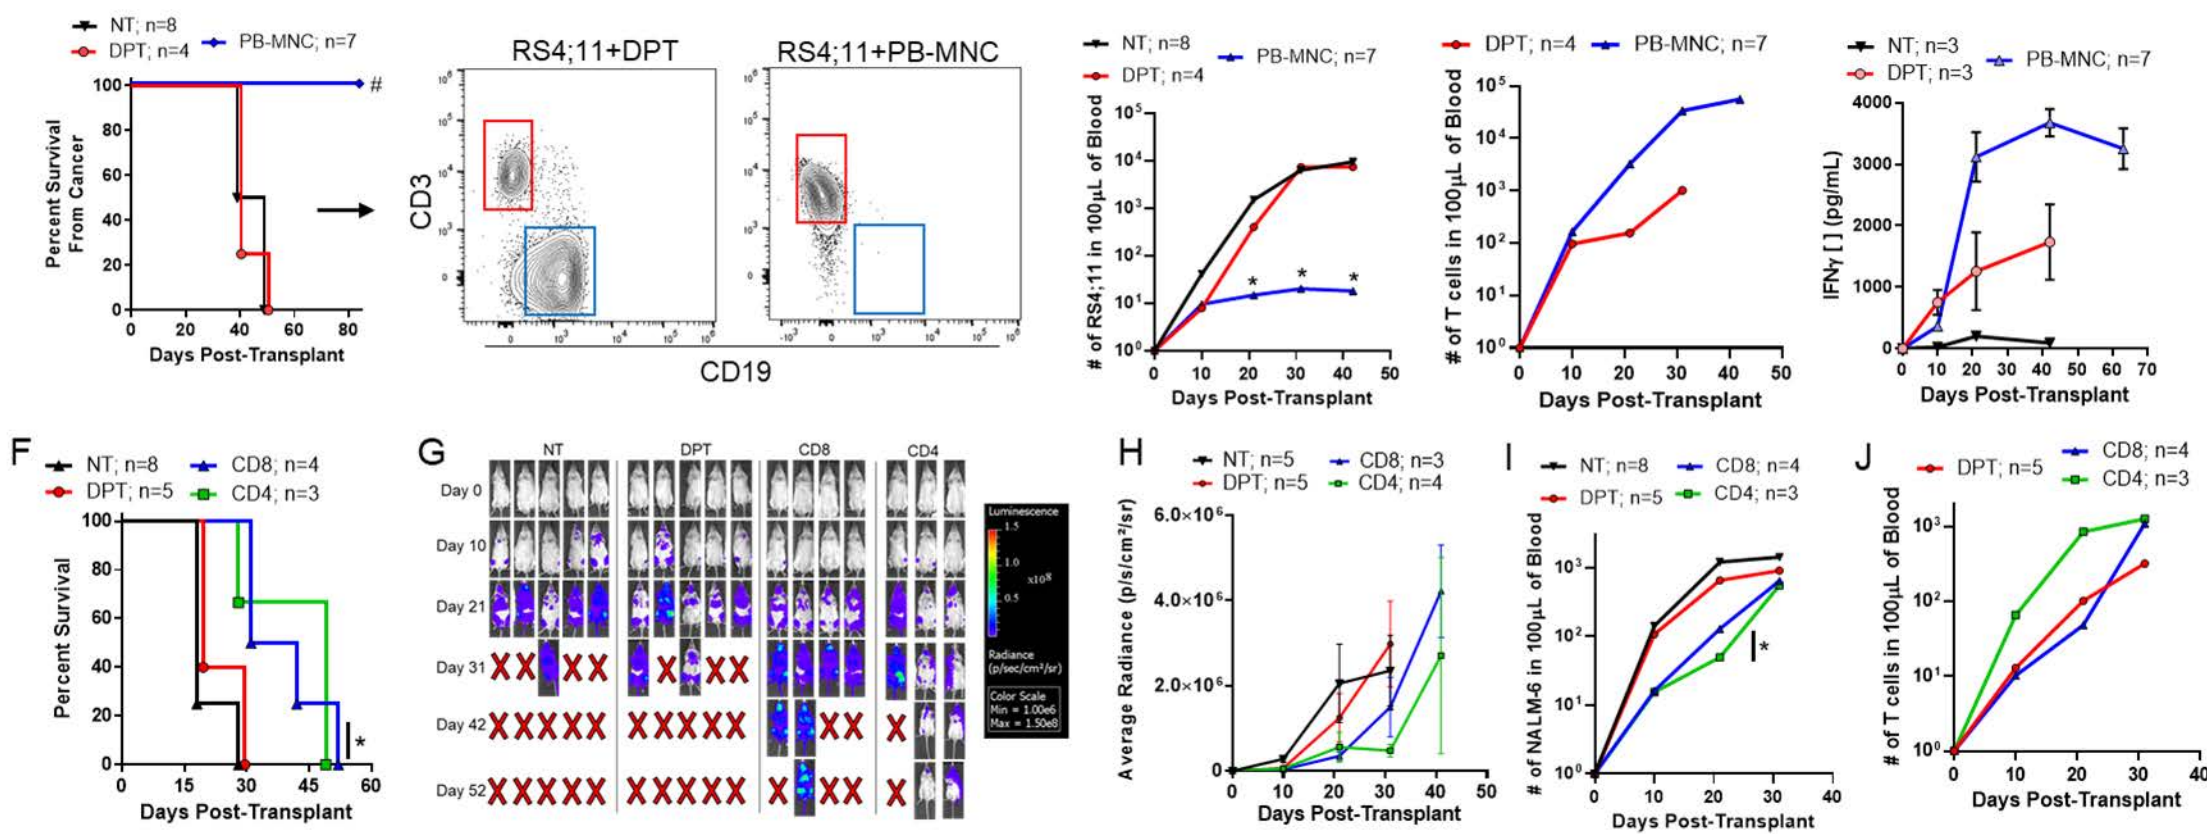

**Figure 6**

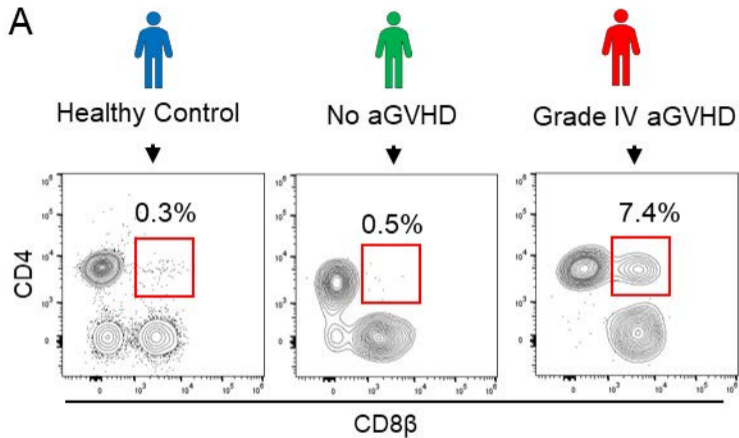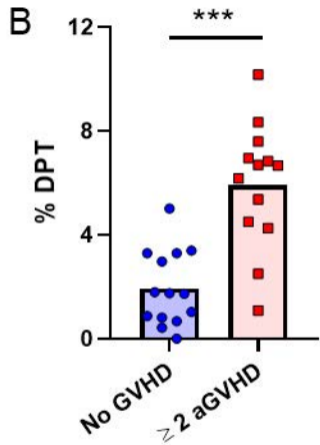

**Figure 7**
